# Supplementary material for: A Decision-Support Software to Improve the Standard Care in Chinese Type 2 Diabetes
Source: Hindawi journal article supplement (doi:10.1155/2019/5491743), 2019-11-11

Supplementary figure 1. The screen of the software: If the physician did not choose metformin as the first anti-diabetic drug: The software would ask the physicians whether they would prefer to use metformin as first line therapy automatically. If “yes”: metformin would be recorded as first line drug and be highlighted. If “no”: the physician must choose one of the reasons that they refuse to use metformin.

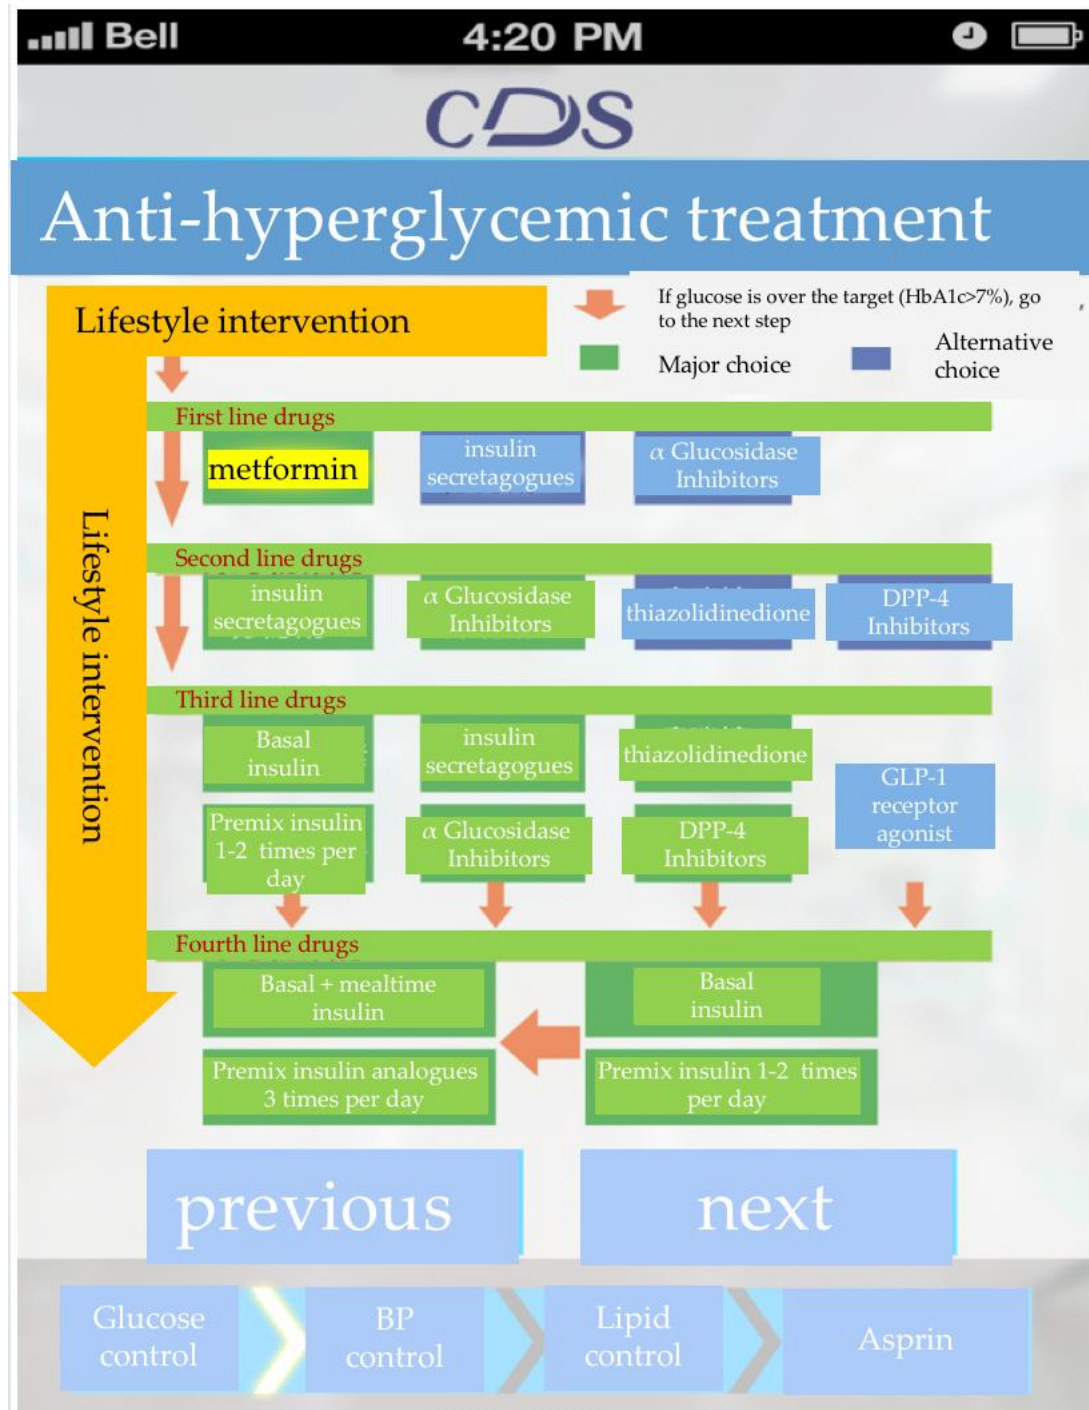

Supplement: f1 [file 5491743.f1.pdf]
